# Supplementary material for: Profile of the bile acid FXR-FGF15 pathway in the glucolipid metabolism disorder of diabetic mice suffering from chronic stress
Source: PeerJ journal article supplement (doi:10.7717/peerj.16407), 2023-11-15
Supplement: Figure_1.zip [file Figure_1.zip]

## Sheet: Sucrose preference rate(%)
CUMS 4W	0h		15h
	1% sucrose water(g)	boiled water(g)	1% sucrose water(g)	boiled water(g)	1% sucrose water(g) 15h-1% sucrose water(g) 0h	boiled water(g) 15h-1% boiled water(g) 0h	Sucrose preference rate(%)
Control	120.8	224.8	116.5	223.7	4.3	1.1	79.6296
	130.8	253.6	126.2	252.4	4.6	1.2	79.3103
	149.9	245.8	143.3	245.1	6.6	0.7	90.411
	125.7	132	120.8	130.5	4.9	1.5	76.5625
	113	226	105.6	224.9	7.4	1.1	87.0588
	132.5	224.8	126.5	223.2	6	1.6	78.9474
	131.2	222.7	125.4	221.1	5.8	1.6	78.3784
	137.9	190.5	131.9	188.7	6	1.8	76.9231
	158.9	206.9	152.9	205.3	6	1.6	78.9474
	138.8	216	134.2	214.5	4.6	1.5	75.4098
CUMS	127.8	144.4	123.6	141.4	4.2	3	58.3333
	121.2	137.5	116.8	134.3	4.4	3.2	57.8947
	144.2	270.1	138.3	268.3	5.9	1.8	76.6234
	122.4	145.6	118	143.8	4.4	1.8	70.9677
	124.2	137.6	119	134.9	5.2	2.7	65.8228
	128.8	129.3	124.4	125.9	4.4	3.4	56.4103
	117.1	131.7	110.6	129.3	6.5	2.4	73.0337
	126.2	137.2	120.6	134.4	5.6	2.8	66.6667
	120.6	127.7	116.4	125.1	4.2	2.6	61.7647
	115.9	240.5	112.4	238.7	3.5	1.8	66.0377
T2DM	140.1	245.9	138.6	242.9	1.5	3	33.3333
	151.6	242.5	148.3	237.7	3.3	4.8	40.7407
	156.8	268	151.6	265.9	5.2	2.1	71.2329
	167.4	125.3	159.1	121.9	8.3	3.4	70.9402
	128.7	134.8	124.9	128.1	3.8	6.7	36.1905
	149	126	146.1	121.8	2.9	4.2	40.8451
	123.6	133.7	120.7	130.4	2.9	3.3	46.7742
	146.5	250.7	144.1	246.2	2.4	4.5	34.7826
	143.3	152	139.8	148.6	3.5	3.4	50.7246
	148.8	256.8	145.2	255.2	3.6	1.6	69.2308
T2DM+CUMS	118.6	241.4	115.1	238.7	3.5	2.7	56.4516
	155.5	203.9	152.5	201.3	3	2.6	53.5714
	149.5	260.3	146.8	257.4	2.7	2.9	48.2143
	130.5	139.7	127.3	135.9	3.2	3.8	45.7143
	155.4	157.4	151.3	153.5	4.1	3.9	51.25
	143.6	159.4	137.9	153.3	5.7	6.1	48.3051
	151.4	162.1	148.6	158.5	2.8	3.6	43.75
	143.8	268.4	138.8	263.9	5	4.5	52.6316
	158.5	145.2	155.4	143.3	3.1	1.9	62
	128.5	128.3	124.8	120.9	3.7	7.4	33.3333
