# Supplementary material for: Profile of the bile acid FXR-FGF15 pathway in the glucolipid metabolism disorder of diabetic mice suffering from chronic stress
Source: PeerJ journal article supplement (doi:10.7717/peerj.16407), 2023-11-15
Supplement: Figure_2.zip [file Figure_2.zip]

## Sheet: GHbA1c
Y value	X value					OD	Concentration(ng/ml)
1.098	550744.451773, 106.770851				Control	1.098	140.28	140280
1.105	553211.569639, 106.294693					1.105	140.111	140111				0.11	0.051	0.125	0.145	0.202	0.496	1.102	2.179	OVRFLW
1.043	531102.283963, 110.71964					1.043	141.695	141695				0.11	0.045	0.142	0.13	0.177	0.454	0.982	1.754	OVRFLW
1.239	599117.357971, 98.150142					1.239	137.274	137274
1.07	540802.749969, 108.733644					1.07	140.98	140980
0.997	514307.026885, 114.335311					0.997	143.011	143011					OD	Concentration(ng/ml)				OD	Concentration(ng/ml)
1.233	597112.909416, 98.479622					1.233	137.386	137386				0.11	0.059	4000			0.11	0.065	4000
1.257	605103.580764, 97.179154					1.257	136.942	136942				0.125	0.074	2000			0.142	0.097	2000
0.996	513938.03335, 114.417401					0.996	143.042	143042				0.145	0.094	1000			0.13	0.085	1000
1.042	530740.810947, 110.795048					1.042	141.722	141722				0.202	0.151	500			0.177	0.132	500
												0.496	0.445	250			0.454	0.409	250
Y value	X value				CUMS	1.13	139.526	139526				1.102	1.051	125			0.982	0.937	125
1.13	561964.350282, 104.639118					0.93	145.188	145188				2.179	2.128	62.5			1.754	1.709	62.5
0.93	489200.746441, 120.203116					1.017	142.423	142423				OVRFLW		0			OVRFLW		0
1.017	521651.842083, 112.725479					1.087	140.55	140550
1.087	546852.858896, 107.530669					1.097	140.304	140304
1.097	550391.415086, 106.839337					0.939	144.875	144875						y	x ng/ml
0.939	492619.710255, 119.368861					1.196	138.109	138109						OD average	Concentration(ng/ml)
1.196	584650.011959, 100.578898					0.934	145.048	145048				0.059	0.065	0.062	4000
0.934	490722.11858, 119.830453					1.324	135.795	135795				0.074	0.097	0.0855	2000
1.324	627039.374752, 93.779524					1.2	138.028	138028				0.094	0.085	0.0895	1000
1.2	586005.947768, 100.346172											0.151	0.132	0.1415	500
					T2DM	0.674	158.126	158126				0.445	0.409	0.427	250
Y value	X value					0.626	161.931	161931				1.051	0.937	0.994	125
0.674	384840.850168, 152.799407					0.587	165.564	165564				2.128	1.709	1.9185	62.5
0.626	363458.55895, 161.788607					0.772	152.022	152022							0
0.587	345569.748093, 170.163778					0.796	150.786	150786
0.772	426559.0517, 137.855365					0.635	161.167	161167				Modified Exponential: y=a*e^(b/x)
0.796	436417.276785, 134.741352					0.583	165.969	165969				Coefficient Data:
0.635	367519.406442, 160.000949					0.744	153.579	153579				a =	115.964
0.583	343707.224244, 171.085883					0.629	161.674	161674				b =	0.209019
0.744	414886.636047, 141.733786					0.605	163.819	163819
0.629	364814.902367, 161.187094
0.605	353886.242151, 166.164849				T2DM+CUMS	0.953	144.402	144402
						0.969	143.88	143880
Y value	X value					0.743	153.637	153637
0.953	497908.850831, 118.100841					0.808	150.199	150199
0.969	503910.758644, 116.694182					0.822	149.539	149539
0.743	414466.253277, 141.877543					0.475	180.065	180065
0.808	441297.358259, 133.251316					0.712	155.531	155531
0.822	446950.565583, 131.565901					0.555	168.998	168998
0.475	291238.10661, 201.908516					0.83	149.173	149173
0.712	401310.107604, 146.528714					0.785	151.342	151342
0.555	330517.528535, 177.913269
0.83	450161.867532, 130.627354
0.785	431915.356179, 136.145782
