# Supplementary material for: Profile of the bile acid FXR-FGF15 pathway in the glucolipid metabolism disorder of diabetic mice suffering from chronic stress
Source: PeerJ journal article supplement (doi:10.7717/peerj.16407), 2023-11-15
Supplement: Figure_3.zip [file Figure_3.zip]

## Sheet: Insulin
			Standard1	Standard2	Standard average	Control	CUMS	T2DM	T2DM+CUMS		Concentration(pg/ml)		Control	CUMS	T2DM	T2DM+CUMS
		sd0	0.034	0.04	0.037	0.444	0.623	0.807	0.415				0.407	0.586	0.77	0.378
		sd1	0.107	0.119	0.113	0.549	0.622	0.408	0.629		6.25	0.076	0.512	0.585	0.371	0.592
		sd2	0.186	0.19	0.188	0.604	0.605	0.583	0.917		12.5	0.151	0.567	0.568	0.546	0.88
		sd3	0.329	0.33	0.3295	0.47	0.744	0.44	0.458		25	0.2925	0.433	0.707	0.403	0.421
		sd4	0.633	0.663	0.648	0.422	0.705	0.46	1.098		50	0.611	0.385	0.668	0.423	1.061
		sd5	1.273	1.296	1.2845	0.894	0.922	0.513	0.549		100	1.2475	0.857	0.885	0.476	0.512
		sd6	2.44	2.415	2.4275	0.428	0.672	0.721	0.671		200	2.3905	0.391	0.635	0.684	0.634
		sd7	3.674	3.638	3.656	0.435	0.724	0.472	0.585		400	3.619	0.398	0.687	0.435	0.548
												Y value	X value	Concentration(pg/ml)
												0.44	37.5549	4807.03
												0.407	35.3534	4525.24
												0.295	25.8255	3305.67
												0.391	33.6	4300.81
												0.433	37.3833	4785.06
												0.35	30.2865	3876.67
												0.362	31.257	4000.9
												0.385	33.6174	4303.02
												0.391	34.0927	4363.86
												0.398	34.6454	4434.61
	Y value
												0.512	43.3695	5551.29
												0.456	38.8462	4972.31
												0.586	48.9931	6271.12
												0.636	53.4361	6839.82
												0.571	48.1478	6162.92
												0.577	48.6347	6225.25
												0.585	48.9185	6261.57
												0.568	47.649	6099.07
												0.668	55.072	7049.21
												0.635	52.633	6737.02
					x value							0.77	62.5739	8009.46
												0.371	32.5027	4160.35
												0.546	46	5888.01
		Four-parameter Logistic Curve Fitting										0.403	35.0391	4485
												0.423	36.6052	4685.46
		==================================================================										0.476	40.6966	5209.17
		Formular: y = (A - D) / [1 + (x/C)^B] + D										0.684	56.2518	7200.23
		------------------------------------------------------------------										0.362	31.257	4000.9
		A = 5.41725										0.435	37.5385	4804.93
		B = -1.38127										0.383	32.954	4218.11
		C = 243.41736
		D = 0.05829										0.521	44.0973	5644.46
		r^2 = 0.99987										0.608	51.1544	6547.76
		==================================================================										0.592	49.4402	6328.35
												0.88	70.6499	9043.19
												0.421	36.4492	4665.49
												1.061	84.0434	10757.6
		==================================================================										0.512	43.4361	5559.82
		X Y-value Y-average CV(%) Y-calculaion value Y-residual error										0.634	52.5589	6727.54
		------------------------------------------------------------------										0.457	38.9269	4982.64
		6.2500 0.0760 0.0921 0.0161										0.548	46.1503	5907.23
		12.5000 0.1510 0.1456 -0.0054
		25.0000 0.2925 0.2798 -0.0127
		50.0000 0.6110 0.5995 -0.0115
		100.0000 1.2475 1.2715 0.0240
		200.0000 2.3905 2.3764 -0.0141
		400.0000 3.6190 3.6225 0.0035
		==================================================================
		total data 7
		Residual Sum of Squares 0.00137
			Standard1	Standard2	Standard average
		sd0	0.042	0.041	0.0415	0		Concentration(pg/ml)
		sd1	0.1	0.104	0.102	0.0605		6.25	0.0605
		sd2	0.181	0.178	0.1795	0.138		12.5	0.138
		sd3	0.338	0.316	0.327	0.2855		25	0.2855
		sd4	0.652	0.617	0.6345	0.593		50	0.593
		sd5	1.273	1.177	1.225	1.1835		100	1.1835
		sd6	2.307	2.125	2.216	2.1745		200	2.1745
		sd7	3.692	3.417	3.5545	3.513		400	3.513
	Y value
					x value
		Four-parameter Logistic Curve Fitting
		==================================================================
		Formular: y = (A - D) / [1 + (x/C)^B] + D
		------------------------------------------------------------------
		A = 7.26535
		B = -1.13393
		C = 424.25469
		D = 0.00334
		r^2 = 1.00000
		==================================================================
		==================================================================
		X Y-value Y-average CV(%) Y-calculation value Y-residual error
		------------------------------------------------------------------
		6.2500 0.0605 0.0636 0.0031
		12.5000 0.1380 0.1344 -0.0036
		25.0000 0.2855 0.2849 -0.0006
		50.0000 0.5930 0.5938 0.0008
		100.0000 1.1835 1.1844 0.0009
		200.0000 2.1745 2.1737 -0.0008
		400.0000 3.5130 3.5132 0.0002
		==================================================================
		number of data 7
		Residual Sum of Squares 0.00003

## Sheet: HOMA-IR-HOMA-β
								Insulin(pg/ml)	Insulin(ug/l)	Insulin(pmol/l)	Insulin(μU/ml)	serum glucrose(mmol/L)	HOMA-IR		HOMA-β
								4807.03	4.80703	827.77	118.847	6.7	35.39	35.39	742.795	742.795
								4525.24	4.52524	779.246	111.88	8.9	44.2548	44.2548	414.371	414.371
								3305.67	3.30567	569.236	81.728	9.6	34.8706	34.8706	267.961	267.961
								4300.81	4.30081	740.599	106.331	9.8	46.3133	46.3133	337.56	337.56
								4785.06	4.78506	823.987	118.304	7.7	40.4863	40.4863	563.352	563.352
								3876.67	3.87667	667.562	95.8453	12.4	52.8214	52.8214	215.383	215.383
								4000.9	4.0009	688.955	98.9167	12.5	54.9537	54.9537	219.815	219.815
								4303.02	4.30302	740.981	106.386	11.5	54.3752	54.3752	265.966	265.966
								4363.86	4.36386	751.457	107.89	16.3	78.1606	78.1606	168.579	168.579
								4434.61	4.43461	763.64	109.64	15.2	74.0677	74.0677	187.418	187.418
									0	0	0		0	0	0	0
								5551.29	5.55129	955.932	137.248	15.1	92.1086	92.1086	236.634	236.634
								4972.31	4.97231	856.232	122.934	16.8	91.7904	91.7904	184.863	184.863
								6271.12	6.27112	1079.89	155.045	23	158.49	158.49	159.02	159.02
								6839.82	6.83982	1177.82	169.105	13.6	102.215	102.215	334.861	334.861
								6162.92	6.16292	1061.25	152.37	16.1	109.029	109.029	241.856	241.856
								6225.25	6.22525	1071.99	153.911	16.2	110.816	110.816	242.379	242.379
								6261.57	6.26157	1078.24	154.809	11.6	79.8125	79.8125	382.244	382.244
								6099.07	6.09907	1050.26	150.791	14.8	99.1871	99.1871	266.887	266.887
								7049.21	7.04921	1213.87	174.282	16.3	126.258	126.258	272.316	272.316
								6737.02	6.73702	1160.12	166.564	15.3	113.263	113.263	282.311	282.311
									0	0	0		0	0	0	0
								8009.46	8.00946	1379.23	198.023	37.8	332.678	332.678	115.465	115.465
								4160.35	4.16035	716.412	102.859	34.3	156.803	156.803	66.7915	66.7915
								5888.01	5.88801	1013.91	145.573	36	232.916	232.916	89.5833	89.5833
								4485	4.485	772.318	110.886	40.5	199.594	199.594	59.9381	59.9381
								4685.46	4.68546	806.836	115.842	42.2	217.267	217.267	59.8664	59.8664
								5209.17	5.20917	897.019	128.79	38.8	222.09	222.09	72.9686	72.9686
								7200.23	7.20023	1239.88	178.016	40.6	321.219	321.219	95.9653	95.9653
								4000.9	4.0009	688.955	98.9167	38.1	167.499	167.499	57.1773	57.1773
								4804.93	4.80493	827.41	118.795	39.9	210.664	210.664	65.2722	65.2722
								4218.11	4.21811	726.358	104.287	41.3	191.424	191.424	55.1783	55.1783
									0	0	0		0	0	0	0
								5644.46	5.64446	971.975	139.551	37.4	231.965	231.965	82.3312	82.3312
								6547.76	6.54776	1127.52	161.884	34.9	251.101	251.101	103.111	103.111
								6328.35	6.32835	1089.74	156.46	40.2	279.541	279.541	85.2641	85.2641
								9043.19	9.04319	1557.24	223.58	37.7	374.621	374.621	130.749	130.749
								4665.49	4.66549	803.398	115.348	41.8	214.291	214.291	60.2339	60.2339
								10757.6	10.7576	1852.45	265.966	40.4	477.556	477.556	144.155	144.155
								5559.82	5.55982	957.401	137.459	41.6	254.146	254.146	72.1569	72.1569
								6727.54	6.72754	1158.48	166.329	51.8	382.927	382.927	68.8734	68.8734
								4982.64	4.98264	858.011	123.189	38.8	212.433	212.433	69.7955	69.7955
								5907.23	5.90723	1017.23	146.048	34.9	226.537	226.537	93.0243	93.0243
