# Supplementary material for: Profile of the bile acid FXR-FGF15 pathway in the glucolipid metabolism disorder of diabetic mice suffering from chronic stress
Source: PeerJ journal article supplement (doi:10.7717/peerj.16407), 2023-11-15
Supplement: Figure_4.zip [file Figure_4.zip]

## Sheet: Body weight
				CUMS 0w	CUMS 1w	CUMS 2w	CUMS 3w	CUMS 4w
			Control	25.4	25.9	26.4	27.3	27.2
				26.4	27	27.6	28.2	28.7
				26.1	27	27	27.7	28
				25.5	25.2	25.6	26.5	27.3
				26.1	26.9	27.8	27.7	27.9
				28	29.2	30.1	30.5	30.5
				27.1	28.1	28.2	29.1	28.7
				27.9	29.2	30.5	30.9	31.2
				26.8	27.3	27.5	28.4	28.4
				24.9	26.3	27.6	28.2	28.1
			CUMS	26.3	28.6	27.9	27.7	29.8
				26.5	26.9	27.6	27.9	29.6
				26.5	26.3	26.5	27	26.8
				26.7	26.8	27.7	27.8	29.1
				27.6	28.7	28.6	28.8	29.6
				24.8	26.1	25.9	26.8	27.5
				26.1	26.7	26.5	27.2	28.4
				25.8	26.2	27.8	28.1	29.1
				27	26.9	27.8	27.9	28.3
				25.9	25.7	26.2	27.1	27.9
			T2DM	27.1	26.6	26.2	27.9	28.9
				28.7	26.9	26	28.3	29
				26.2	25.3	24.9	26.7	27.3
				29.1	30.8	28.5	31.3	33.7
				29.1	27.9	26.6	28.7	29.1
				28.9	27.9	27.5	30.4	31.7
				26.6	25.4	24.8	27.1	28.2
				30.2	30	29.4	31.3	32.7
				29.8	29	28.1	29.7	31.3
				28	27.5	27	29.5	30.1
			T2DM+CUMS	28.3	26.4	26	27.5	27.7
				29.1	27.4	27.7	29.4	28.6
				26.3	23.3	24.3	25.5	26.6
				27.3	26.3	25.9	27.9	27.5
				27.7	25.8	24.9	28.9	29.6
				27.5	26.1	25	27.4	26.7
				32.8	31	31.3	32.9	33.5
				27.6	26.7	27	28.6	29.2
				29	27.9	27	30.6	30.4
				27.5	26.9	26	28.8	29

## Sheet: liver-body weight
			Body weight before sacrifice	Liver weight	Liver weight/Body weight before sacrifice
		Control	27.3	1.1	0.040293			Control	CUMS	T2DM	T2DM+CUMS
			27.9	0.8	0.0286738			0.040293	0.0426357	0.0532319	0.0897436
			30.8	1.3	0.0422078			0.0286738	0.0579151	0.0442478	0.0682594
			29.7	1.2	0.040404			0.0422078	0.0824373	0.0551181	0.0677966
			31.8	1.5	0.0471698			0.040404	0.0568562	0.0622951	0.0676157
			28.5	1	0.0350877			0.0471698	0.0470085	0.0597484	0.099631
			32.6	1.5	0.0460123			0.0350877	0.05	0.0584795	0.0814607
			29.4	1.1	0.037415			0.0460123	0.0395683	0.0555556	0.0641026
			36.3	1.2	0.0330579			0.037415	0.0392857	0.0436242	0.0636943
			30.7	1	0.0325733			0.0330579	0.049505	0.0482759	0.076412
								0.0325733	0.0383275	0.0607903	0.0855019
		CUMS	25.8	1.1	0.0426357
			25.9	1.5	0.0579151
			27.9	2.3	0.0824373
			29.9	1.7	0.0568562
			23.4	1.1	0.0470085
			28	1.4	0.05
			27.8	1.1	0.0395683
			28	1.1	0.0392857
			30.3	1.5	0.049505
			28.7	1.1	0.0383275
		T2DM	26.3	1.4	0.0532319
			33.9	1.5	0.0442478
			25.4	1.4	0.0551181
			30.5	1.9	0.0622951
			31.8	1.9	0.0597484
			34.2	2	0.0584795
			36	2	0.0555556
			29.8	1.3	0.0436242
			29	1.4	0.0482759
			32.9	2	0.0607903
		T2DM+CUMS	23.4	2.1	0.0897436
			29.3	2	0.0682594
			29.5	2	0.0677966
			28.1	1.9	0.0676157
			27.1	2.7	0.099631
			35.6	2.9	0.0814607
			31.2	2	0.0641026
			31.4	2	0.0636943
			30.1	2.3	0.076412
			26.9	2.3	0.0855019
