# Supplementary material for: Profile of the bile acid FXR-FGF15 pathway in the glucolipid metabolism disorder of diabetic mice suffering from chronic stress
Source: PeerJ journal article supplement (doi:10.7717/peerj.16407), 2023-11-15
Supplement: Figure_5.zip [file Figure_5.zip]

## Sheet: FXR-FGF15-0322
	ACTB	FXR	FGF15	ACTB	FXR	∆Ct	control ∆Ct mean	∆∆Ct	2（-∆∆Ct）	FGF15	∆Ct	control ∆Ct mean	∆∆Ct	2（-∆∆Ct）
T2DM	14.5398	20.7362	21.4778	14.575	20.4683	5.89333	4.94464	0.948693	0.518102	21.4189	6.84398	6.62661	0.217364	0.860136
	14.5413	20.3866	21.4144
	14.6439	20.2821	21.3646
T2DM	13.9728	18.81	20.6868	13.93	18.8054	4.87541		-0.0692233	1.04915	20.6103	6.68034		0.0537214	0.963448
	13.9065	18.7937	20.5373
	13.9106	18.8125	20.6068
T2DM	14.9443	19.0671	21.5511	15.0842	19.1493	4.06517		-0.879469	1.8397	21.4397	6.35553		-0.271085	1.20672
	14.6654	19.2544	21.4182
	15.6427	19.1264	21.3498
T2DM+CUMS	14.9542	20.2058	23.368	14.8115	20.2855	5.47404		0.529405	0.69284	23.28	8.46855		1.84194	0.278947
	14.7908	20.3319	23.3653
	14.6894	20.3188	23.1067
T2DM+CUMS	15.0921	21.3573	23.3851	15.1436	20.9177	5.77412		0.82948	0.562732	23.375	8.23134		1.60473	0.328797
	15.0911	20.691	23.4432
	15.2476	20.7049	23.2966
T2DM+CUMS	14.4489	19.6964	23.4479	14.3902	19.7244	5.33417		0.389533	0.763376	23.4296	9.0394		2.41279	0.187793
	14.3758	19.8258	23.4336
	14.3458	19.6509	23.4073

## Sheet: FXR-0325
	ACTB	FXR	FGF15	ACTB	FXR	∆Ct	control ∆Ct mean	∆∆Ct	2（-∆∆Ct）	FGF15	∆Ct	control ∆Ct mean	∆∆Ct	2（-∆∆Ct）
T2DM	16.9978	22.7198		17.0089	22.612	5.60309	6.04779	-0.444694	1.36103	#DIV/0!	#DIV/0!	#DIV/0!	#DIV/0!	#DIV/0!
	16.9962	22.4324
	17.0326	22.6837
T2DM	14.6994	21.6055		14.7795	21.3783	6.59885		0.551062	0.682517	#DIV/0!	#DIV/0!		#DIV/0!	#DIV/0!
	14.7645	21.2845
	14.8745	21.2449
T2DM	15.4445	21.4422		15.4215	21.3629	5.94142		-0.106368	1.07651	#DIV/0!	#DIV/0!		#DIV/0!	#DIV/0!
	15.3951	21.2656
	15.4249	21.381
T2DM+CUMS	14.2936	21.0085		14.4649	20.9598	6.49492		0.447134	0.733499	#DIV/0!	#DIV/0!		#DIV/0!	#DIV/0!
	14.543	20.8436
	14.558	21.0273
T2DM+CUMS	18.8035	26.6587		18.7883	26.3603	7.57205		1.52426	0.347658	#DIV/0!	#DIV/0!		#DIV/0!	#DIV/0!
	18.6961	26.2764
	18.8652	26.1459
T2DM+CUMS	15.9949	22.3478		16.0677	22.4322	6.36446		0.316668	0.802922	#DIV/0!	#DIV/0!		#DIV/0!	#DIV/0!
	16.0765	22.5496
	16.1318	22.3992

## Sheet: FGF15-0325
	ACTB	FXR	FGF15	ACTB	FXR	∆Ct	control ∆Ct mean	∆∆Ct	2（-∆∆Ct）	FGF15	∆Ct	control ∆Ct mean	∆∆Ct	2（-∆∆Ct）
T2DM	14.6994		21.0147	14.7795	#DIV/0!	#DIV/0!	#DIV/0!	#DIV/0!	#DIV/0!	21.0282	6.24874	5.7763	0.472442	0.720744
	14.7645		21.155
	14.8745		20.9149
T2DM	15.4445		21.2934	15.4215	#DIV/0!	#DIV/0!		#DIV/0!	#DIV/0!	21.3553	5.93382		0.157524	0.896562
	15.3951		21.5137
	15.4249		21.2589
T2DM	14.7927		20.1474	14.8464	#DIV/0!	#DIV/0!		#DIV/0!	#DIV/0!	19.9927	5.14633		-0.629966	1.54753
	14.8726		19.9906
	14.8739		19.8401
T2DM+CUMS	14.878		23.469	14.8323	#DIV/0!	#DIV/0!		#DIV/0!	#DIV/0!	23.381	8.54876		2.77247	0.146354
	14.7973		23.3305
	14.8214		23.3435
T2DM+CUMS	15.0266		23.2964	15.0695	#DIV/0!	#DIV/0!		#DIV/0!	#DIV/0!	23.4081	8.33863		2.56233	0.169302
	15.0929		23.6371
	15.0889		23.2908
T2DM+CUMS	14.4031		23.76	14.4673	#DIV/0!	#DIV/0!		#DIV/0!	#DIV/0!	23.5963	9.12893		3.35264	0.097894
	14.5533		23.5616
	14.4455		23.4672
